# Supplementary material for: Brain Structure Mediates Impact of Pulmonary Dysfunction on Cognition in Spinocerebellar Ataxia Type 3
Source: Research Square preprint supplement (doi:10.21203/rs.3.rs-7952676/v1), 2025-11-18
Supplement: Supplementary file 1 [file 802f424196fcd0f542f579ae.docx]

**Table2.Association of Pulmonary impairment with Regional Brain Atrophy**

| Variables | β | S.E | t | *P* | β (95%CI) |
| --- | --- | --- | --- | --- | --- |
| lIFGoperc | -0.17 | 0.07 | -2.35 | **0.021** | -0.17 (-0.32 ~ -0.03) |
| lIFGorb | -0.12 | 0.04 | -2.88 | **0.005** | -0.12 (-0.20 ~ -0.04) |
| rIFGorb | -0.12 | 0.04 | -2.9 | **0.005** | -0.12 (-0.20 ~ -0.04) |
| rROL | -0.26 | 0.09 | -2.75 | **0.008** | -0.26 (-0.44 ~ -0.07) |
| lSFGmedial | -0.34 | 0.14 | -2.46 | **0.016** | -0.34 (-0.61 ~ -0.07) |
| lOFCpost | -0.11 | 0.05 | -2.38 | **0.02** | -0.11 (-0.21 ~ -0.02) |
| rOFCpost | -0.09 | 0.04 | -2.07 | **0.042** | -0.09 (-0.18 ~ -0.01) |
| rOFClat | -0.03 | 0.01 | -2.22 | **0.029** | -0.03 (-0.05 ~ -0.01) |
| lINS | -0.32 | 0.12 | -2.68 | **0.009** | -0.32 (-0.55 ~ -0.09) |
| rINS | -0.38 | 0.13 | -2.92 | **0.005** | -0.38 (-0.64 ~ -0.13) |
| lPHG | -0.16 | 0.06 | -2.61 | **0.011** | -0.16 (-0.28 ~ -0.04) |
| lFFG | -0.35 | 0.13 | -2.65 | **0.01** | -0.35 (-0.61 ~ -0.09) |
| rFFG | -0.26 | 0.11 | -2.33 | **0.023** | -0.26 (-0.48 ~ -0.04) |
| lSTG | -0.47 | 0.17 | -2.69 | **0.009** | -0.47 (-0.81 ~ -0.13) |
| lMTG | -0.91 | 0.31 | -2.99 | **0.004** | -0.91 (-1.51 ~ -0.31) |
| rMTG | -0.84 | 0.25 | -3.41 | **0.001** | -0.84 (-1.32 ~ -0.36) |
| lTPOmid | -0.16 | 0.07 | -2.13 | **0.036** | -0.16 (-0.31 ~ -0.01) |
| rITG | -0.51 | 0.19 | -2.66 | **0.01** | -0.51 (-0.88 ~ -0.13) |
| rSPG | -0.27 | 0.13 | -2.03 | **0.046** | -0.27 (-0.53 ~ -0.01) |
| lSMG | -0.17 | 0.08 | -2.01 | **0.048** | -0.17 (-0.33 ~ -0.01) |
| lPCUN | -0.36 | 0.16 | -2.31 | **0.024** | -0.36 (-0.67 ~ -0.05) |
| lACCpre | -0.14 | 0.06 | -2.56 | **0.013** | -0.14 (-0.25 ~ -0.03) |
| lCER4_5 | -0.16 | 0.07 | -2.16 | **0.034** | -0.16 (-0.31 ~ -0.01) |
| lCER6 | -0.34 | 0.12 | -2.9 | **0.005** | -0.34 (-0.57 ~ -0.11) |
| rCER6 | -0.31 | 0.14 | -2.21 | **0.03** | -0.31 (-0.59 ~ -0.04) |

Abbreviations:lIFGoperc: Inferior Frontal Gyrus, opercular part; lIFGorb: Inferior Frontal Gyrus, orbital part; rIFGorb: Inferior Frontal Gyrus, orbital part; rROL: Rolandic Operculum; lSFGmedial: Superior Frontal Gyrus, medial; lOFCpost: Orbitofrontal Cortex, posterior; rOFCpost: Orbitofrontal Cortex, posterior; rOFClat:Orbitofrontal Cortex, lateral; lINS: Insula; rINS: Insula; lPHG: Parahippocampal Gyrus; lFFG: Fusiform Gyrus; rFFG: Fusiform Gyrus; rSPG: Superior Parietal Gyrus; lSMG: Supramarginal Gyrus; lPCUN: Precuneus; lSTG: Superior Temporal Gyrus; lMTG: Middle Temporal Gyrus; rMTG: Middle Temporal Gyrus; lTPOmid: Temporal Pole, middle part; rITG: Inferior Temporal Gyrus; lCER4_5: Cerebellum Lobules IV-V; lCER6: Cerebellum Lobule VI; rCER6: Cerebellum Lobule VI; lACCpre: Anterior Cingulate Cortex, pregenual
