# Supplementary material for: Brain Structure Mediates Impact of Pulmonary Dysfunction on Cognition in Spinocerebellar Ataxia Type 3
Source: Research Square preprint supplement (doi:10.21203/rs.3.rs-7952676/v1), 2025-11-18
Supplement: Supplementary file 2 [file f8cb482c0db1a5381572c9ff.docx]

Table1. Demographic features of the SCA3 participants.

| Variables | Total (n = 76) | NPF(n = 35) | IPF(n = 41) | Statistic | *P* |
| --- | --- | --- | --- | --- | --- |
|
| Age, Mean ± SD | 42.83 ± 11.14 | 40.46 ± 10.70 | 44.85 ± 11.24 | t=-1.74 | 0.086 |
| CAGexp, Mean ± SD | 75.03 ± 4.12 | 74.86 ± 4.41 | 75.17 ± 3.90 | t=-0.33 | 0.743 |
| TIV, Mean ± SD | 1424.88 ± 122.39 | 1427.63 ± 113.59 | 1422.54 ± 130.78 | t=0.18 | 0.858 |
| BMI, Mean ± SD | 21.82 ± 3.40 | 22.09 ± 3.40 | 21.59 ± 3.44 | t=0.62 | 0.534 |
| Duration, Mean ± SD | 7.28 ± 4.33 | 6.37 ± 4.21 | 8.05 ± 4.32 | t=-1.71 | 0.092 |
| ICARS, Mean ± SD | 28.58 ± 12.78 | 25.54 ± 10.95 | 31.17 ± 13.76 | t=-1.95 | 0.055 |
| Sex, n(%) |  |  |  | χ²=0.06 | 0.802 |
| Male | 51 (67.11) | 24 (68.57) | 27 (65.85) |  |  |
| Female | 25 (32.89) | 11 (31.43) | 14 (34.15) |  |  |
| Smoking history, n(%) |  |  |  | χ²=0.17 | 0.684 |
| No Smoking | 41 (53.95) | 18 (51.43) | 23 (56.10) |  |  |
| Smoking | 35 (46.05) | 17 (48.57) | 18 (43.90) |  |  |
| Education, n(%) |  |  |  | χ²=1.94 | 0.584 |
| Primary school​​ | 16 (21.05) | 6 (17.14) | 10 (24.39) |  |  |
| Junior high school | 19 (25.00) | 11 (31.43) | 8 (19.51) |  |  |
| Senior high school​ | 23 (30.26) | 11 (31.43) | 12 (29.27) |  |  |
| College​​ | 18 (23.68) | 7 (20.00) | 11 (26.83) |  |  |
| t: t-test, χ²: Chi-square test  SD: standard deviation; NPF: Normal pulmonary function; IPF:Impaired pulmonary function ; | | | | | |
|  | | | | | |
